# Supplementary material for: Accumulation of JAK activation loop phosphorylation is linked to type I JAK inhibitor withdrawal syndrome in myelofibrosis
Source: PubMed Central journal article supplement — Sci Adv. 2018 Nov 28;4(11):eaat3834. doi: 10.1126/sciadv.aat3834 (PMC6261652; doi:10.1126/sciadv.aat3834), 2018-11-28
Supplement: aat3834_SM.pdf [file aat3834_SM.pdf]

## Supplementary Materials for

### **Accumulation of JAK activation loop phosphorylation is linked to type I JAK inhibitor withdrawal syndrome in myelofibrosis**

Denis Tvorogov, Daniel Thomas, Nicholas P. D. Liau, Mara Dottore, Emma F. Barry, Maya Lathi, Winnie L. Kan, Timothy R. Hercus, Frank Stomski, Timothy P. Hughes, Vinay Tergaonkar, Michael W. Parker, David M. Ross, Ravindra Majeti, Jeffrey J. Babon, Angel F. Lopez\*

\*Corresponding author. Email: angel.lopez@sa.gov.au

Published 28 November 2018, *Sci. Adv.* **4**, eaat3834 (2018)

DOI: 10.1126/sciadv.aat3834

#### **This PDF file includes:**

Table S1. Primary myelofibrosis patient characteristics.

Table S2. Clinical characteristics and genotype of reported cases of ruxolitinib withdrawal syndrome.

Fig. S1. Graphical representation of experiments used in JAK inhibitor withdrawal studies in patient samples and TF1.8 cells.

Fig. S2. Ruxolitinib washout triggers intracellular signaling.

Fig. S3. Type I JAK2 inhibitor protects JAK2 from degradation and down-regulation.

Fig. S4. Selective targeting of JAK1 kinase by itacitinib.

Fig. S5. Type II JAK2 inhibitor CHZ868 blocks proliferation of cells expressing wild-type JAK2 and JAK2<sup>V617F</sup>.

Fig. S6. Type II inhibitor withdrawal does not trigger intracellular signaling.

**Table S1. Primary myelofibrosis patient characteristics.**

| Patient # | Sex/Age | Mutation                        | Karyotype                      | Ruxolitinib dose | Hb (g/dL) | Platelets (x10 <sup>9</sup> /mL) | White Cells (x10 <sup>9</sup> /mL) | Spleen size or cm below costal margin |
|-----------|---------|---------------------------------|--------------------------------|------------------|-----------|----------------------------------|------------------------------------|---------------------------------------|
| RAH1      | M/83    | JAK2 V617F (VAF 59%)            | 46, XY                         | 20 mg bd         | 136       | 285                              | 18.4                               | 0 cm BCM                              |
| RAH2      | M/63    | JAK2 V617F (VAF 49%)            | 46, XY                         | 20 mg bd         | 122       | 368                              | 8.7                                | 15 cm BCM                             |
| RAH3      | M/75    | JAK2 V617F (VAF 30%)            | 46,XY del20q                   | 10 mg bd         | 93        | 78                               | 10.0                               | 9 cm BCM                              |
| RAH4      | F/61    | CALR                            | 46,XX                          | 15 mg bd         | 105       | 454                              | 25.4                               | 13 cm BCM                             |
| SU669     | M/68    | JAK2 V617F (VAF 48%)            | +9                             | 10 mg bd         | 11.5      | 75                               | 42                                 | Splenectomy                           |
| SU467     | M/67    | JAK2 V617F (VAF 28%)            | 46,XY                          | 0                | 8.0       | 50                               | 5.9                                | 18 x12 cm                             |
| SU469     | M/63    | JAK2 V617F (VAF 97%)            | 46,XY                          | 0                | 11.1      | 88                               | 18.7                               | 19.7 x16.3 cm                         |
| SU477     | M/73    | JAK2 V617F (VAF 87%)            | 46,XY                          | 15 mg bd         | 9.3       | 212                              | 10.0                               | 16.5 cm BCM                           |
| SU478     | M/78    | JAK2 V617F (VAF 45%)<br>Post-PV | 46,XY                          | 5 mg bd          | 10.6      | 40                               | 34.8                               | 15.5 cm BCM                           |
| SU479     | M/72    | JAK2 V617F                      | 46,XY                          | 20 mg bd         | 9.6       | 243                              | 34.8                               | 21.5 cm BCM                           |
| SU510     | M/74    | JAK2 V617F (VAF 22%)            | 46,XY                          | 0                | 9.7       | 778                              | 41.4                               | Splenectomy                           |
| SU482     | F/67    | JAK2 V617F (VAF 82%)            | 45,X,-del5<br>q31q35),t(16;21] | 0                | 8.4       | 15                               | 33.8                               | Unknown                               |
| SU178     | M/58    | CALR                            | 46,XY                          | 0                | 11.5      | 331                              | 7.4                                | 7 cm BCM                              |
| SU239     | F/59    | CALR                            | 46,XY                          | 0                | 11.9      | 209                              | 12.7                               | 5 cm BCM                              |
| SU594     | F/71    | CALR                            | 46,XY                          | 20 mg bd         | 10.3      | 105                              | 46.1                               | 5 cm BCM                              |
| SU497     | M/43    | CALR                            | 46,XY                          | 0                | 11.6      | 745                              | 6.6                                | Not palpable                          |
| SU533     | M/83    | CALR                            | 46,XY                          | 0                | 10.3      | 83                               | 20.3                               | 11.5 cm BCM                           |
| SU280     | F/76    | CALR                            | 46,XX                          | 0                | 11.6      | 471                              | 4.1                                | Not palpable                          |

**Table S2. Clinical characteristics and genotype of reported cases of ruxolitinib withdrawal syndrome.**

| Sex/Age | Mutation                 | Cytogenetics                                   | Time to Symptom Onset (Days)  | Symptoms                                                                                                 | Reference |
|---------|--------------------------|------------------------------------------------|-------------------------------|----------------------------------------------------------------------------------------------------------|-----------|
| F/56    | JAK V617F (VAF = 39%)    | Unknown                                        | 2<br>(after taper initiation) | Pyrexia, cough, mild diarrhea                                                                            | 9         |
|         |                          |                                                | 5                             | Hypotension, tachycardia, acute respiratory distress syndrome                                            |           |
| F/59    | JAK2 V617F               | Unknown                                        | <7                            | Respiratory distress, severe anemia, splenomegaly                                                        | 17        |
| F/69    | JAK2 V617F               | Complex t(8;22)(q24.1;q112), t(14;18)(q32;q21) | 1                             | Septic shock-like syndrome, hypotension, pyrexia, confusion                                              | 17        |
| M/44    | JAK2 V617F               | Unknown                                        | 1                             | Respiratory distress, pleural effusion, pericardial effusion                                             | 17        |
| M/64    | JAK2 V617F               | Unknown                                        | 3                             | Pyrexia, splenomegaly, fatigue, pruritis, night sweats                                                   | 17        |
| F/56    | JAK2 V617F               | Unknown                                        | 14                            | Digital artery thrombosis, polyarticular arthritis                                                       | 17        |
| F/70    | JAK2 V617F               | 70% trisomy(9) and del(20q)                    | 28                            | Abdominal pain, massive splenomegaly, acute renal failure, hyperkalemia, hyperphosphatemia               | 19        |
| M/76    | JAK2 V617F (VAF = 62.6%) | Isolated del(20)                               | 1                             | Pyrexia, inflammatory syndrome, acute respiratory distress syndrome                                      | 20        |
| F/72    | Unknown                  | Unknown                                        | 14                            | Hypotension, tachycardia, tachypnea, hypoxia                                                             | 21        |
| M/76    | JAK2 V617F               | Del(17)                                        | 7                             | Pyrexia, hypotension, low-grade disseminated intravascular coagulation, spontaneous tumor lysis syndrome | 24        |

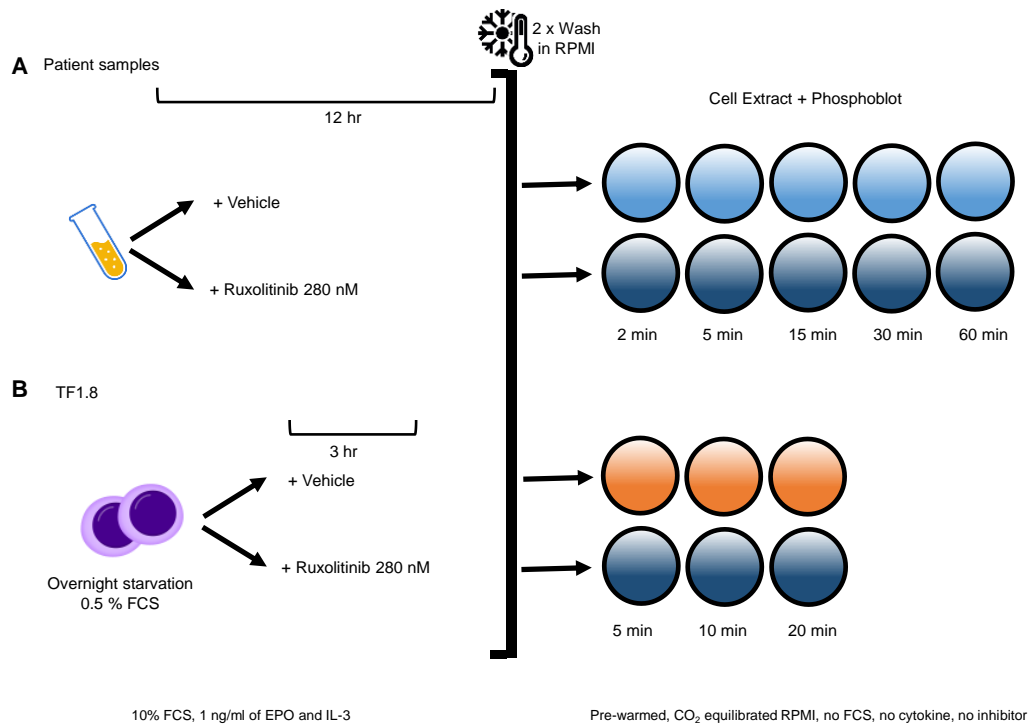

**Fig. S1. Graphical representation of experiments used in JAK inhibitor withdrawal studies in patient samples and TF1.8 cells.**

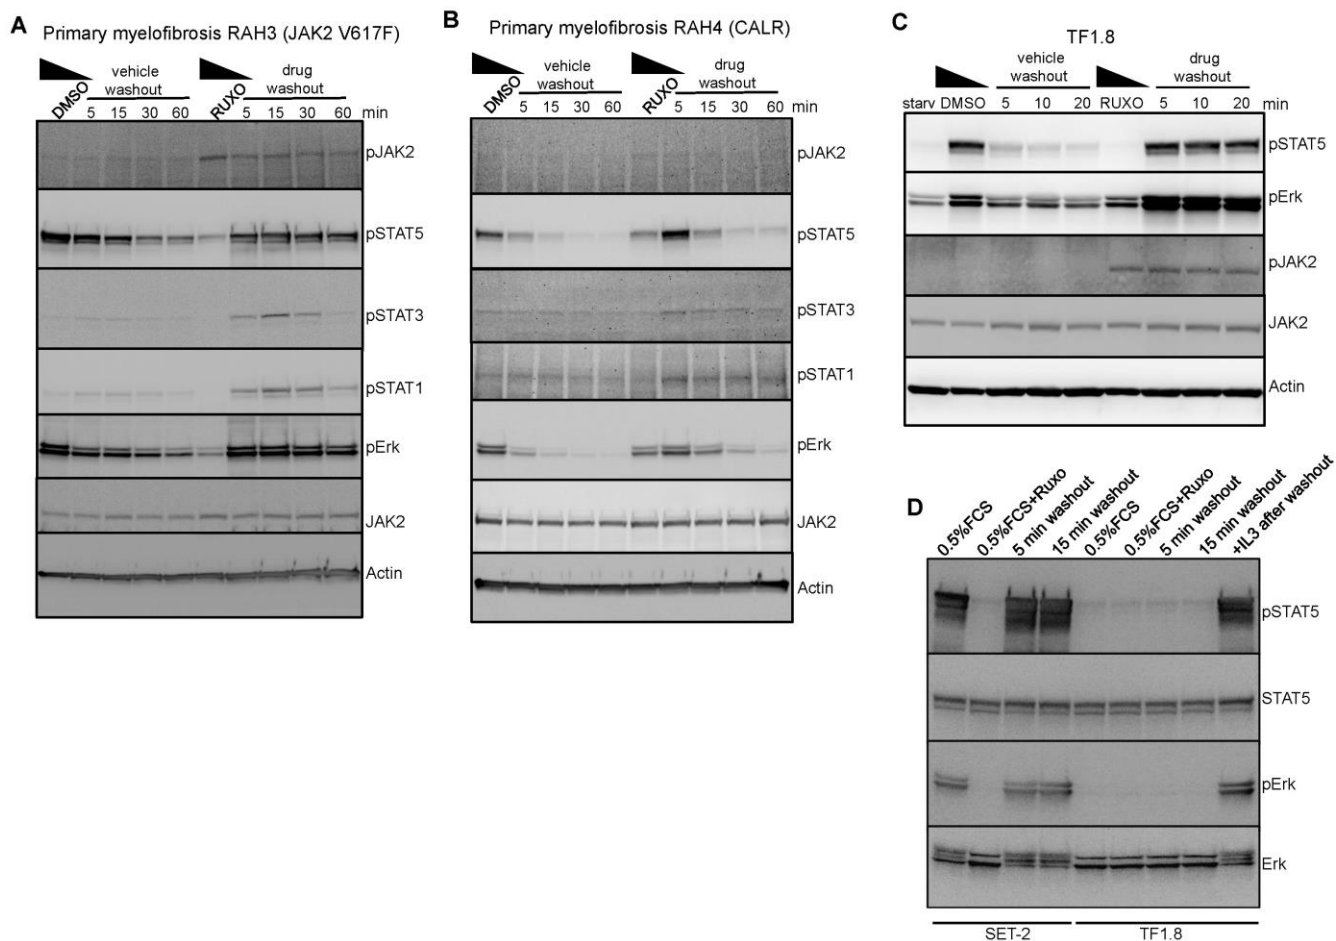

**Fig. S2. Ruxolitinib washout triggers intracellular signaling.** Primary cells from MPN patient RAH3 carrying the JAK2<sup>V617F</sup> mutation (**A**) or patient RAH4 carrying a calreticulin mutation (**B**), were analysed for p-JAK2, p-STAT5, p-STAT3, p-STAT1 and p-Erk following withdrawal of ruxolitinib as described in Figure 1. (**C**) After overnight incubation in 0.5% FCS, TF1.8 cells were cultured in 10% FCS with 1 ng/ml EPO and IL-3 and 280 nM ruxolitinib or DMSO for 3 hours. Cells were extensively washed in cold media and cultured without additives for the indicated periods of time, cell lysates were prepared and immunoblotted for the indicated proteins. (**D**) SET-2 or TF1.8 cells were incubated in 0.5% FCS for 6 hours before addition of 280nM ruxolitinib for 90 minutes. Cells were washed and cultured in RPMI media for 5 and 15 minutes. Whole cell lysates were prepared and immunoblotted with p-STAT5, p-Erk, STAT5 and Erk antibodies. To confirm that TF1.8 cells were able to activate JAK dependent signalling after 15 minutes of ruxolitinib washout, cells were stimulated with 50 ng/ml IL-3 for 5 minutes.

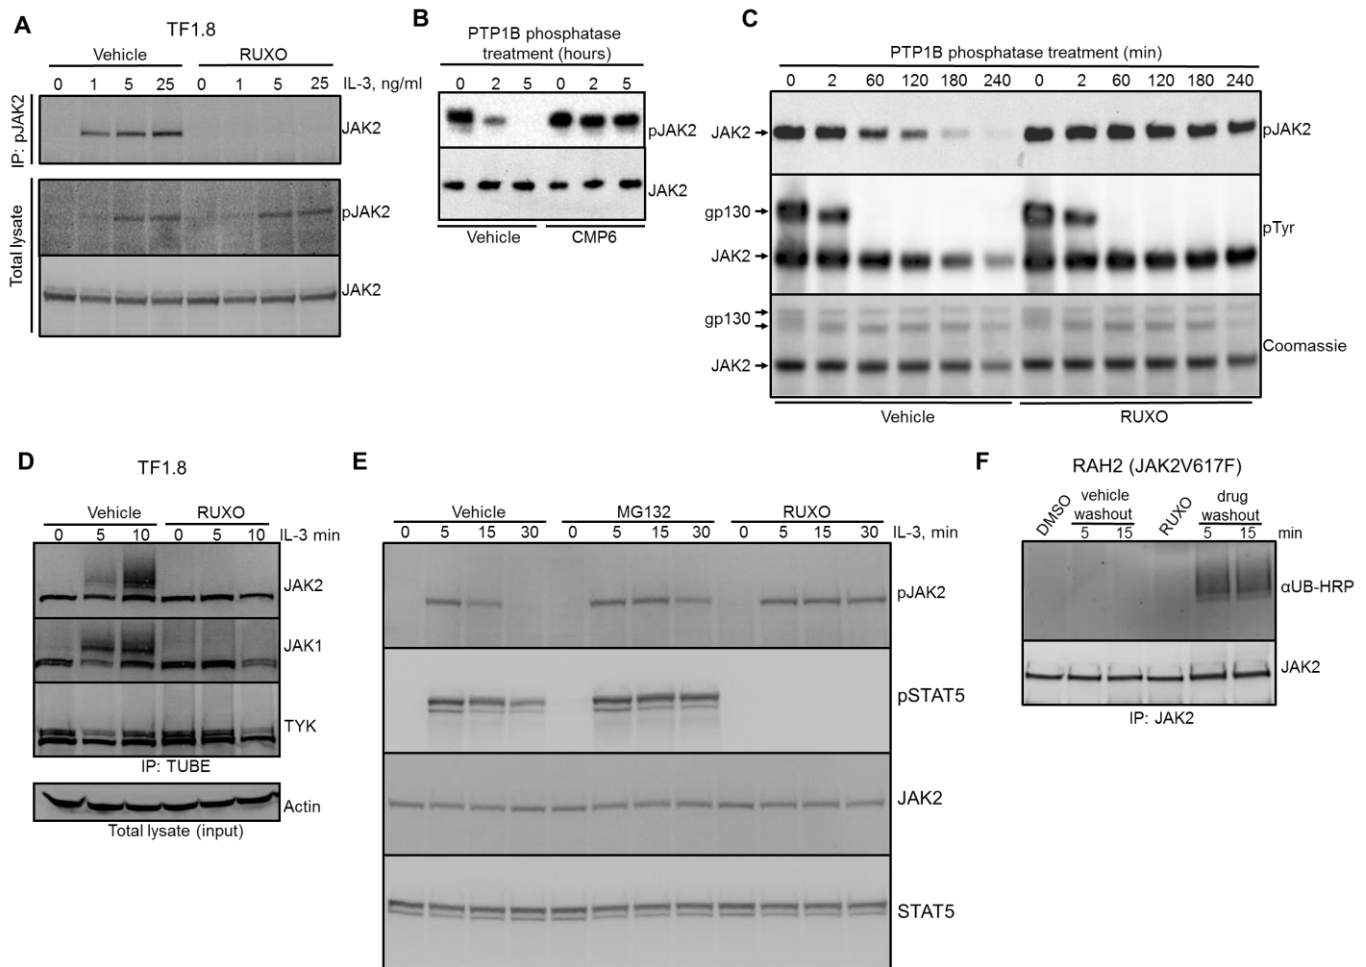

**Fig. S3. Type I JAK2 inhibitor protects JAK2 from degradation and down-regulation.** (A) TF1.8 cells were starved overnight in the presence of 0.5% FCS, pre-incubated with either vehicle or 280 nM of ruxolitinib for 10 minutes and stimulated with different doses of IL-3 for 5 minutes. Cells were lysed and subjected to immunoprecipitation with p-JAK2 antibody followed by immunoblotting with JAK2 antibody. As a control, total lysates from the same experiment were immunoblotted with p-JAK2 and JAK2 antibodies. (B) Recombinant JAK2 kinase domain was mixed with recombinant PTP1B and either no inhibitor or Type I JAK inhibitor CMP6 in phosphatase assay buffer. Phosphatase reactions were incubated at room temperature for 0, 2 and 5 hours, fractionated by SDS-PAGE and immunoblotted with p-JAK2 or JAK2 antibodies. (C) Recombinant JAK2 kinase domain and gp130 were mixed with recombinant PTP1B and either no inhibitor or ruxolitinib in phosphatase assay buffer. Phosphatase reactions were incubated at room temperature for 0, 2, 60, 120, 180 and 240 minutes, fractionated by SDS-PAGE and immunoblotted with p-JAK2 or anti-phospho-tyrosine (4G10) antibodies. Coomassie staining was used as a loading control. (D) TF1.8 cells were starved overnight in the presence of 0.5% FCS, pre-incubated for 10 minutes with MG132 plus either vehicle or ruxolitinib and stimulated with 25 ng/ml of IL-3 for 0, 5 and 10 minutes. Cells were lysed and subjected to precipitation with TUBE-agarose followed by immunoblotting with JAK2, JAK1 and TYK antibodies.

Additionally, whole cell lysates were immunoblotted with actin antibody. **(E)** TF1.8 cells were starved overnight in the presence of 0.5% FCS, pre-incubated with either vehicle, 10  $\mu$ M MG132 or 280 nM ruxolitinib for 10 minutes and stimulated with 25 ng/ml of IL-3 for 0, 5, 15 and 30 minutes. Whole cell lysates were prepared and immunoblotted with p-JAK2, p-STAT5, JAK2 and STAT5 antibodies. **(F)** Mononuclear cells from myelofibrosis patient RAH2 were cultured in 10% FCS with 1 ng/ml EPO and IL-3 and 280 nM of ruxolitinib or DMSO for 12 hours. Cells were then washed in cold RPMI and cultured in MG132 without additives for 5 or 15 minutes. Cells were lysed and subjected to immunoprecipitation with JAK2 antibody followed by immunoblotting with Ub-HRP or JAK2 antibody

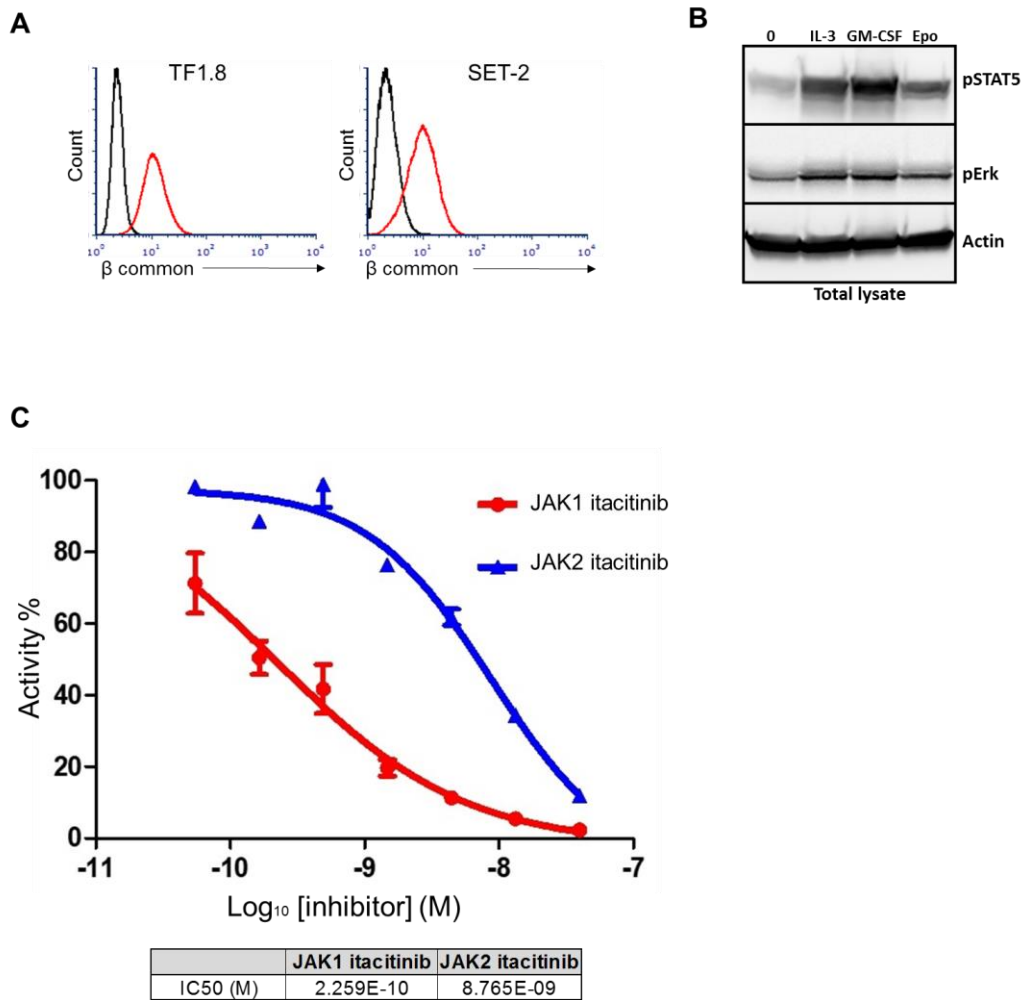

**Fig. S4. Selective targeting of JAK1 kinase by itacitinib.** (A) Flow cytometric analysis of TF1.8 and SET-2 cells with  $\beta$ c antibody (red line) and an isotype control (black line). (B) SET-2 cells were starved overnight in 0.5% FCS and stimulated for 5 minutes with nil, 250 ng/ml IL-3, 25 ng/ml GM-CSF or 25 ng/ml Epo. Whole cell lysates were prepared and immunoblotted with p-STAT5, p-Erk and Actin antibodies. (C) *In vitro* kinase assay to determine the JAK1 IC<sub>50</sub> for itacitinib. JAK2 was included to determine specificity of Itacitinib towards JAK1

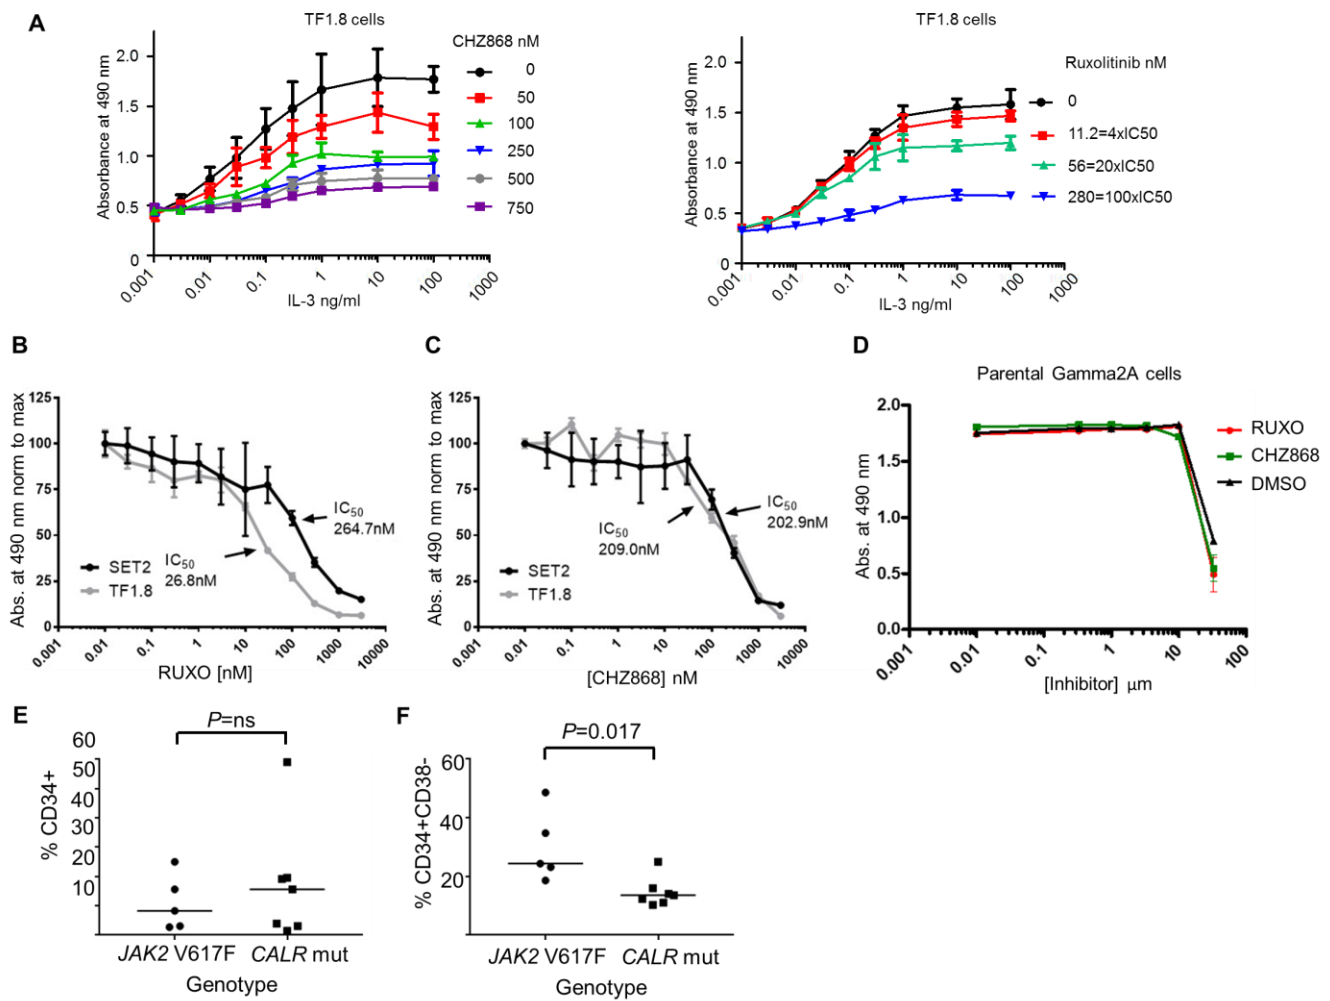

**Fig. S5. Type II JAK2 inhibitor CHZ868 blocks proliferation of cells expressing wild-type JAK2 and JAK2<sup>V617F</sup>.** (A) TF1.8 cells starved of GM-CSF overnight, were incubated in 10% FCS with titrations of IL-3 in the presence of different doses of ruxolitinib or CHZ868. After 48 hours, cell proliferation was assessed using CellTiter 96 reagent. Data shows the mean of triplicate measurements  $\pm$  SD from a representative experiment. (n=3). (B, C) Starved TF1.8 cells and SET-2 cells were incubated in 50 ng/ml IL3 and 10% FCS with titrations of ruxolitinib (B) or CHZ868 (C) in triplicate. After 48 hours, cell proliferation was assessed using CellTiter 96 reagent. Data is expressed as absorbance normalized to maximum proliferation in the presence of DMSO alone and shows the mean of triplicate measurements  $\pm$  SD from a representative experiment. Two additional biological replicates were generated in order to obtain mean  $\pm$  SEM IC<sub>50</sub> values (n=3) as depicted in Fig 4C. IC<sub>50</sub> values were determined using Graph Pad Prism. (D) Parental  $\gamma$ 2A cells were plated in DMEM media containing 10% FCS and different doses of DMSO, ruxolitinib or CHZ868. After 48 hours, cell proliferation was assessed using CellTiter 96 reagent. Data shows the mean of triplicate measurements  $\pm$  SD from a representative experiment from three biological replicates. (E) The percentage of CD34+ cells detectable in the mononuclear population of peripheral blood samples

collected from patients with myelofibrosis comparing *JAK2* mutant positive samples with *CALR* mutant samples. Bars represent the median,  $P=0.6$  was determined using the Mann-Whitney U test. **(F)**

Percent of CD34<sup>+</sup>CD38<sup>-</sup> stem/progenitor cells within the CD34<sup>+</sup> population in peripheral blood from myelofibrosis patients comparing patients with *JAK2* vs *CALR* mutations. Bars represent the median,  $P=0.017$  was determined using the Mann-Whitney U test.

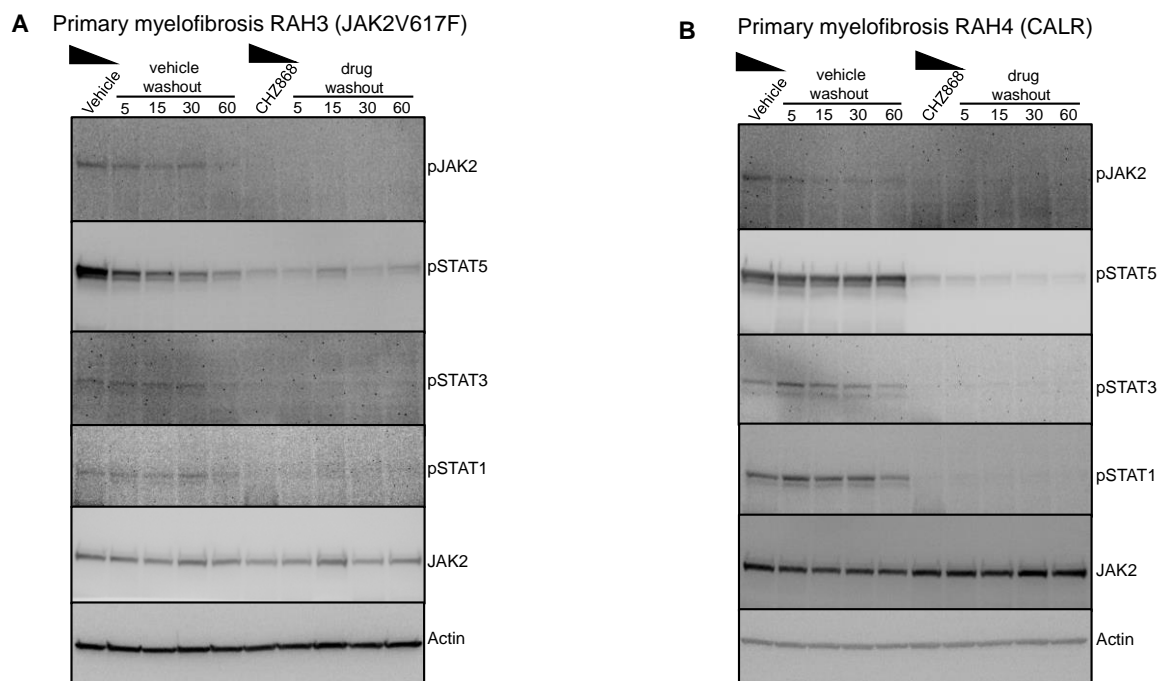

**Fig. S6. Type II inhibitor withdrawal does not trigger intracellular signaling.** Whole cell lysate from myelofibrosis patient RAH3 carrying a JAK2<sup>V617F</sup> mutation (**A**) or patient RAH4 carrying a calreticulin mutation (**B**) were immunoblotted for p-JAK2, p-STAT5, p-STAT3 and p-STAT1 following withdrawal of CHZ868 as described in Figure 5A.
